# Supplementary material for: Pathogenic variants in the paired-related homeobox 1 gene (PRRX1) cause craniosynostosis with incomplete penetrance
Source: PubMed Central journal article supplement (PMC11554955; doi:10.1016/j.gim.2023.100883), 2023-09
Supplement: mmc2.pdf [file mmc2.pdf]

# **Pathogenic variants in the paired-related homeobox 1 gene (*PRRX1*) cause craniosynostosis with incomplete penetrance**

Rebecca S. Tooze, Kerry A. Miller, Sigrid M. A. Swagemakers, *et al.*

## **Supplemental Methods**

### **Screening individuals with craniosynostosis**

Primers were designed to screen all coding exons of *PRRX1* (Supplemental Table 2) in 388 samples. A 20 ng sample of DNA was mixed with each primer (at a final concentration of 0.5  $\mu$ M per primer), 1x Q5 buffer, 200  $\mu$ M each dNTP and 0.5 U of Q5<sup>®</sup> high-fidelity DNA polymerase (New England BioLabs). Cycling conditions consisted of a 30 s denaturation step at 98°C, followed by 35 cycles of 98°C for 10 s, 60–65°C for 30 s (details in Supplemental Table 2), and 72°C for 30 s, followed by a final extension step of 72°C for 10 min. Illumina-specific sequence adaptors and 10 bp sample indexes were attached using the Access Array<sup>™</sup> Barcode Library for Illumina<sup>®</sup> Sequencers-384, Single Direction (Fluidigm), at a concentration of 0.4  $\mu$ M per primer with Q5<sup>®</sup> high-fidelity DNA polymerase as above, for 9 cycles only. Indexed PCR products were pooled, purified with AxyPrep MAG PCR Clean-Up Kit (Axygen) and quantified using the 2200 TapeStation (Agilent Technologies) with a High Sensitivity D1000 ScreenTape and a Qubit<sup>®</sup> 1.0 Fluorometer (ThermoFisher Scientific), following the manufacturer's instructions. Pooled and indexed PCR products were diluted to a final concentration of 9 pM and sequenced using the Illumina MiSeq platform with a MiSeq Reagent Kit v2 for 500 cycles (Illumina) according to the manufacturer's instructions, before analysis using amplimap software (including mapping, coverage analysis and variant calls).<sup>1</sup>

### **Targeted resequencing**

Analysis of 541 samples with undiagnosed craniosynostosis (considering a variety of sutures fused) for variants in *PRRX1* was undertaken using IDT's hybridization and capture protocol (version 4, May 2019). Individual libraries for capture-based resequencing were prepared using the 'Twist Bioscience' kits for the enzymatic fragmentation and universal adapter system (protocol version 11 (September 2019) Rev1) or the 'xGen<sup>™</sup> DNA Library Prep EZ Kit' and protocol (IDT, protocol version 1 (December 2021)). DNA was fragmented to ~200 bp,

before adding adapters and indexing primers, and subsequently analysed using broad-range Qubit and D1000 TapeStation reagents (average fragment size of 330 bp). The prepared libraries were pooled to a total of 6 µg of DNA and between 32–40 samples per hybridization capture reaction. The hybridization reactions were carried out at 65°C for 16 hours. After hybridization, the pooled libraries were washed and post-capture PCR was performed following manufacturer’s protocol (IDT xGen hybridization capture of DNA libraries for NGS target enrichment, 7 PCR cycles were used), for a panel containing 2054 probes. The amplified capture reactions were washed with beads before quantification and validation using high-sensitivity (HS) qubit reagents and HS D1000 TapeStation, and next generation sequencing analysis using Miseq v3 (150-cycle, MRC WIMM Sequencing Facility). Data were analyzed using amplimap software.<sup>1</sup>

### **Coverage analysis**

In a subset of patients (n = 479) included in the targeted resequencing analysis, coverage was assessed. Normalized coverage was calculated by dividing the coverage for each gene by the mean coverage of all genes (n = 41) screened in a given sample. This value was normalized to the average coverage for all samples for a given gene. The normalized mean coverage for the gene with the largest deviation from 1 was removed for each sample before the mean and standard deviation (SD) of coverage for all other genes was calculated. After ranking each sample by SD, the error behaviour was calculated as  $SD_b - SD_a$ , where a and b correspond to ranked sample numbers. Data quality noticeably deteriorated at n = 479, which corresponded to a SD threshold of 0.045, and all samples with a SD value above 0.045 were removed from the analysis. The two deletions identified were independently confirmed using array comparative genomic hybridization; individual II-2 in Family 14 was reported to harbor the rearrangement  $arr\ 1q24.2(170,622,833-170,688,644) \times 1$  [hg19] and II-1 in Family 15 had  $arr\ 1q24.2q25.2(167,699,849-178,212,109) \times 1$  [hg19].

### **Site-directed mutagenesis**

A vector containing *Prrx1a* was obtained from Michael Kern’s laboratory. Site-directed mutagenesis was conducted using two methods. For the R124Q and N144K plasmids, overlapping primers were designed containing the variant nucleotide in the centre of both complementary primers. Initially, 40 ng of plasmid DNA was added to 1.5 µl of each 10 µM

primer (Supplemental Table 5), 1  $\mu$ l of 10 mM dNTPs, 10  $\mu$ l of Q5 buffer and enhancer, 1  $\mu$ l of Q5 polymerase and up to 50  $\mu$ l of nuclease-free water. Reactions were placed in the Thermal Cycler (BIORAD T100™) at 95°C for 2 min, followed by 95°C for 30 s, 55°C for 1 min and 72°C for 10 min, for 12 cycles. Amplicons were digested with DpnI (NEB, #R0176) in CutSmart Buffer for 4 hours at 37°C. Digested products were transformed into competent *E. coli* (NEB 5-alpha, C2987) using the manufacturers 'High Efficiency Transformation Protocol'. Plasmid DNA was extracted using a miniprep kit (QIAprep Spin 27106, QIAGEN) and sent for dideoxy-sequencing. For all remaining vectors, site-directed mutagenesis was conducted following the NEB Q5 site-directed mutagenesis kit quick protocol (E0554). For these vectors, 25 ng of template DNA was added to 12.5  $\mu$ l Q5 hot start high-fidelity 2x master mix, 0.5  $\mu$ M of each forward and reverse primer (Supplemental Table 5), and up to 25  $\mu$ l of nuclease-free water. The reactions were placed in a thermocycler under the following conditions: 98°C for 30 s, followed by 25 cycles of 98°C for 10 s, 58–72°C (as documented in Supplemental Table 5) for 20 s and 72°C for 5 min; a final extension of 72°C for 2 min was performed. Following site directed mutagenesis, 1  $\mu$ l of product was incubated with 5  $\mu$ l of kinase, ligase, and DpnI (KLD) 2x reaction buffer (NEB, E0554S), 1  $\mu$ l of 10x KLD enzyme mix, and 3  $\mu$ l of nuclease-free water for 5 min at room temperature. Finally, 5  $\mu$ l of the KLD reaction was transformed into 50  $\mu$ l of chemically competent cells (NEB 5-alpha, C2987H) following manufacturer's guidelines. The presence of all variants was confirmed by dideoxy-sequencing (Supplemental Figure 3).

### **Sub-cloning into a HA-tagged vector**

*Prrx1* cDNA was amplified using a Q5 polymerase protocol (1  $\mu$ g of plasmid DNA [pcDNA3.1-*Prrx1a*], 12.5  $\mu$ l Q5 hot start 2x master mix, 10  $\mu$ M of each forward [*Prrx1a*\_mouse\_EcoRI: 5'-GAATTCATGACCTCCAGCTACGGGCACGTTC-3'] and reverse primer [*Prrx1a*\_mouse\_HindIII: 5'-AAGCTTCAGTTGACTGTTGGCACCTGGTTCCTC-3'], to a final volume of 25  $\mu$ l with nuclease-free water). Products were amplified in a thermocycler at 98°C for 30 s, followed by 35 cycles of 98°C for 10 s, 70°C for 20 s and 72°C for 30 s, with a final extension of 72°C for 2 min. A HA and FLAG tagged plasmid was obtained from Addgene (FLAG-HA-pcDNA3.1, #52535) and digested, alongside the amplified PCR products (1  $\mu$ g of plasmid or PCR product), using 1  $\mu$ l of each HindIII-HF and EcoRI-HF in 1x CutSmart Buffer. The products were incubated with enzyme at 37°C for 15 min before adding 1  $\mu$ l of alkaline phosphatase for a further 15 min.

Digested products were run on a 1% agarose gel and gel purified (NEB, T1020 gel extraction kit). Purified *Prrx1a* inserts were ligated into the cut FLAG-HA-pcDNA3.1 plasmid using a quick ligation protocol (NEB, M2200) and a 4:1 ratio of insert DNA to vector ( $\mu$ l). Ligated products were transformed into one shot *Stb/3* chemically competent cells (Invitrogen, C7373-03) following the manufacturer's protocol. Colonies were screened by colony PCR and positive colonies were cultured in LB, supplemented with ampicillin (50  $\mu$ g/ml). The plasmid was purified using a maxiprep kit (Qiagen, 12162) before sequence confirmation by dideoxy sequencing.

The S104G and R115W variants were introduced directly into the HA/FLAG-tagged vector using the Q5 site-directed mutagenesis kit (NEB, E0554S) as described previously for site-directed mutagenesis of the initial *Prrx1a* vector inherited from the Kern lab. An annealing temperature of 65°C or 70°C was used for S104G and R115W, respectively.

**Supplemental Table 1 Phenotypic composition of cohorts of unsolved CRS probands**

| Phenotype <sup>a</sup> | Complete Genomics Trios <sup>b</sup> |                        | Clinical Genetics Group (Oxford) Resequencing Cohort |                        | Yale WES Cohort        |                        | Totals                 |                        |                      |
|------------------------|--------------------------------------|------------------------|------------------------------------------------------|------------------------|------------------------|------------------------|------------------------|------------------------|----------------------|
|                        | <i>PRRX1</i> -negative               | <i>PRRX1</i> -positive | <i>PRRX1</i> -negative                               | <i>PRRX1</i> -Positive | <i>PRRX1</i> -negative | <i>PRRX1</i> -positive | <i>PRRX1</i> -negative | <i>PRRX1</i> -positive | Percent (%) positive |
| <b>NS metopic</b>      |                                      |                        | 152                                                  |                        | 169                    |                        | 321                    |                        |                      |
| <b>NS unicoronal</b>   |                                      |                        | 178                                                  | 2                      |                        |                        | 178                    | 2                      | 1.11                 |
| <b>NS sagittal</b>     |                                      |                        | 312                                                  | 1                      | 298                    |                        | 610                    | 1                      | 0.16                 |
| <b>NS unilambdoid</b>  |                                      |                        | 10                                                   |                        | 18                     | 1                      | 28                     | 1                      | 3.45                 |
| <b>NS multiple</b>     |                                      |                        | 51                                                   | 3                      | 16                     |                        | 67                     | 3                      | 4.29                 |
| <b>NS bicoronal</b>    | 1                                    | 1                      | 31                                                   |                        |                        |                        | 32                     | 1                      | 3.03                 |
| <b>NS bilambdoid</b>   |                                      |                        | 2                                                    |                        | 2                      |                        | 4                      |                        |                      |
| <b>S metopic</b>       |                                      |                        | 40                                                   | 1                      | 5                      |                        | 45                     | 1                      | 2.17                 |
| <b>S unicoronal</b>    |                                      |                        | 24                                                   |                        |                        |                        | 24                     |                        |                      |
| <b>S sagittal</b>      | 1                                    |                        | 50                                                   |                        | 6                      |                        | 57                     |                        |                      |
| <b>S unilambdoid</b>   |                                      |                        | 2                                                    |                        | 1                      |                        | 3                      |                        |                      |
| <b>S multiple</b>      | 1                                    | 1                      | 40                                                   |                        | 4                      |                        | 45                     | 1                      | 2.17                 |
| <b>S bicoronal</b>     | 1                                    |                        | 9                                                    | 1                      |                        |                        | 10                     | 1                      | 9.09                 |
| <b>S bilambdoid</b>    |                                      |                        | 1                                                    |                        |                        |                        | 1                      |                        |                      |
| <b>Carpenter</b>       |                                      |                        | 1                                                    |                        |                        |                        | 1                      |                        |                      |
| <b>Crouzon</b>         |                                      |                        | 4                                                    |                        |                        |                        | 4                      |                        |                      |
| <b>Pfeiffer</b>        |                                      |                        | 3                                                    |                        |                        |                        | 3                      |                        |                      |
| <b>Saethre Chotzen</b> |                                      |                        | 10                                                   |                        |                        |                        | 10                     |                        |                      |
| <b>Other</b>           |                                      |                        | 1                                                    |                        |                        |                        | 1                      |                        |                      |
| <b>Total</b>           | <b>4</b>                             | <b>2</b>               | <b>921</b>                                           | <b>8</b>               | <b>519</b>             | <b>1</b>               | <b>1444</b>            | <b>11</b>              | <b>0.76%</b>         |

<sup>a</sup>NS = non-syndromic, S = syndromic

<sup>b</sup>9 cases were originally sequenced but 3 have since been solved and removed from the total numbers in this table

**Supplemental Table 2 Primers used (excluding CS tags) for sequencing of gDNA**

| ID         | Target Length (bp) | Forward Primer (5' – 3') | Reverse Primer (5' – 3') | T <sub>m</sub> (°C) |
|------------|--------------------|--------------------------|--------------------------|---------------------|
| PRRX1-Ex1a | 406                | ATCTCTTTGGACCGCGCC       | CTAGCAGGTGACTGACGGAG     | 65                  |
| PRRX1-Ex1b | 378                | AGACCATGACCTCCAGCTAC     | TGAAGTCTGCCATCACCTCTC    | 62                  |
| PRRX1-Ex2  | 390                | GATGTGAGCAAATGAAGCAAG    | GCATGAGCCACTGTGCTG       | 65                  |
| PRRX1-Ex3  | 397                | ACGGAGAATTCCATAGCCATC    | AGCAGCTTGAAACATGACCG     | 60                  |
| PRRX1-Ex4  | 388                | AGTGAATGGCCTGGTTTTGC     | TTCTAGAACTGCAACCCCCAC    | 60                  |
| PRRX1-Ex5  | 453                | TCCCTTTCCTCACTCTACACC    | GCAGATGAAGAAATAACAGAGCAG | 60                  |

**Supplemental Table 3 Primers used in a targeted enrichment analysis**

| Chr  | Start Position (GRCh38) | End Position (GRCh38) | ID                                   |
|------|-------------------------|-----------------------|--------------------------------------|
| chr1 | 170664188               | 170664308             | Target029_PRRX1_ENST00000239461.11_2 |
| chr1 | 170664248               | 170664368             | Target029_PRRX1_ENST00000239461.11_3 |
| chr1 | 170664308               | 170664428             | Target029_PRRX1_ENST00000239461.11_4 |
| chr1 | 170664368               | 170664488             | Target029_PRRX1_ENST00000239461.11_5 |
| chr1 | 170664428               | 170664548             | Target029_PRRX1_ENST00000239461.11_6 |
| chr1 | 170719663               | 170719783             | Target030_PRRX1_ENST00000239461.11_1 |
| chr1 | 170719723               | 170719843             | Target030_PRRX1_ENST00000239461.11_2 |
| chr1 | 170719783               | 170719903             | Target030_PRRX1_ENST00000239461.11_3 |
| chr1 | 170719843               | 170719963             | Target030_PRRX1_ENST00000239461.11_4 |
| chr1 | 170726130               | 170726250             | Target031_PRRX1_ENST00000239461.11_1 |
| chr1 | 170726190               | 170726310             | Target031_PRRX1_ENST00000239461.11_2 |
| chr1 | 170726250               | 170726370             | Target031_PRRX1_ENST00000239461.11_3 |
| chr1 | 170726310               | 170726430             | Target031_PRRX1_ENST00000239461.11_4 |
| chr1 | 170726370               | 170726490             | Target031_PRRX1_ENST00000239461.11_5 |
| chr1 | 170730214               | 170730334             | Target031b_PRRX1_ENST00000367760.7_1 |
| chr1 | 170730274               | 170730394             | Target031b_PRRX1_ENST00000367760.7_2 |
| chr1 | 170735967               | 170736087             | Target032_PRRX1_ENST00000239461.11_1 |
| chr1 | 170736027               | 170736147             | Target032_PRRX1_ENST00000239461.11_2 |
| chr1 | 170736087               | 170736207             | Target032_PRRX1_ENST00000239461.11_3 |
| chr1 | 170736147               | 170736267             | Target032_PRRX1_ENST00000239461.11_4 |

**Supplemental Table 4 Primers used for isolating breakpoints of *PRRX1* deletions**

| ID                     | Forward Primer (5' – 3')       | Reverse Primer (5' – 3')       | Tm (°C) |
|------------------------|--------------------------------|--------------------------------|---------|
| Exons 1–2 <sup>a</sup> | GCAGTGTATCGGAGTTTCAGTTGCTTG    | CCAGCTATCTCTGTGGTAGCTCAATC     | 66      |
| Exons 2–5 <sup>b</sup> | CAGGATCAGGAAGCCCTTCTAATAACTGAC | CTTCCTCAGTTTGTATTTGGTATTGACATT | 66      |

<sup>a</sup>For analysis of Family 14 (76 kb deletion)

<sup>b</sup>For analysis of Family 13 (61.5 kb deletion)



**Supplemental Table 5 Mutagenesis primers**

| ID          | Forward Primer (5' – 3') <sup>a</sup>            | Reverse Primer (5' – 3') <sup>a,b</sup>         | T <sub>m</sub> (°C) |
|-------------|--------------------------------------------------|-------------------------------------------------|---------------------|
| PRRX1-D54A  | GCACAAGCAG <u>C</u> CGAAAGTGTGGGCG               | CGCCACCATGTCCCCGGC                              | 72                  |
| PRRX1-R96M  | AAGCAGCGGAT <u>T</u> GAAACAGGACAAC               | TCTCTTCTTCTTCTCTC                               | 57                  |
| PRRX1-S104G | ATTCAACAGC <u>G</u> GCCAACTGCA                   | GTTGTCCTGTTTCTCCGC                              | 65                  |
| PRRX1-F113L | GGAGCGTGT <u>C</u> TTGAGCGGAC                    | AAGGCCTGCAGTTGGCTG                              | 70                  |
| PRRX1-R115W | TGTCTTTGAG <u>T</u> GGACACATTACCCG               | CGCTCCAAGGCCTGCAGT                              | 70                  |
| PRRX1-R124Q | CCCGGATGCTTTTGTTC <u>A</u> AGAA<br>GATCTCGCACGTC | GACGTGCGAGATCTTCT <u>T</u> GAA<br>CAAAGCATCCGGG | 66                  |
| PRRX1-N144K | GCAGGTGTGGTTTCAGAA <u>G</u> CGA<br>AGAGCCAAGTTC  | GAACTTGGCTCTTCG <u>C</u> TCTGA<br>AACCACACCTGC  | 66                  |
| PRRX1-A147T | GAACCGAAGA <u>A</u> CCAAGTTCG                    | TGAAACCACACCTGCACT                              | 65                  |
| PRRX1-R150H | GCCAAGTCC <u>A</u> CAGGAATGAG                    | TCTTCGGTTCTGAAACCAC                             | 63                  |

<sup>a</sup>Variant substitutions are highlighted in bold and underlined

<sup>b</sup>Site-directed mutagenesis of R124Q and N144K were completed using complementary overlapping primer pairs while the remaining variants were constructed using a Q5 site-directed mutagenesis kit (NEB, E0554) with abutting primers pairs (only the forward primer contains the variant substitution).

**Supplemental Table 6 Primers used for confirming plasmid sequence**

| ID                          | Primer (5' – 3')                  | Tm (°C) |
|-----------------------------|-----------------------------------|---------|
| <i>PRRX1.cDNA.2F</i>        | GGCAACCTCGACACCCTG                | 65      |
| <i>PRRX1.cDNA.6R</i>        | CTGTGCAGGGCTATTGTTGG              | 58      |
| CMV_FW                      | CGCAAATGGGCGGTAGGCGTG             | 65      |
| T7_FW                       | TAATACGACTCACTATAGGG              | 50      |
| BGH_RV                      | TAGAAGGCACAGTCGAGG                | 55      |
| <i>Prrx1a_mouse_EcoRI</i>   | GAATTCATGACCTCCAGCTACGGGCACGTTTC  | 67      |
| <i>Prrx1a_mouse_HindIII</i> | AAGCTTCAGTTGACTGTTGGCACCTGGTTCCTC | 68      |

**Supplemental Table 7 Patterns of suture fusion and presence of syndromic features in individuals heterozygous for functionally significant *PRRX1* variants**

|                              |                 | Start-lost | Arg18Alafs*23 | Arg95*   | Arg96Met | Arg96Met | Asn97Lysfs*35 III-1 | Asn97Lysfs*35 III-2 | Arg115Trp III-1 | Arg115Trp III-3 | Arg124Gln | Asn144Lys I-2 | Asn144Lys III-1 | Ala147Thr | Arg150His | 61.5 kb deletion | 76 kb deletion | 10.5 Mb deletion | Total |   |
|------------------------------|-----------------|------------|---------------|----------|----------|----------|---------------------|---------------------|-----------------|-----------------|-----------|---------------|-----------------|-----------|-----------|------------------|----------------|------------------|-------|---|
|                              | <b>Family #</b> | <b>1</b>   | <b>2</b>      | <b>4</b> | <b>5</b> | <b>6</b> | <b>7</b>            | <b>7</b>            | <b>8</b>        | <b>8</b>        | <b>9</b>  | <b>10</b>     | <b>10</b>       | <b>11</b> | <b>12</b> | <b>13</b>        | <b>14</b>      | <b>15</b>        |       |   |
| Suture(s) fused <sup>a</sup> | Metopic         |            |               |          |          |          |                     |                     |                 |                 |           |               |                 |           |           |                  |                |                  |       | 0 |
|                              | Left Coronal    |            | X             |          |          |          | X                   |                     |                 |                 |           | X             | X               | X         | X         |                  | X              | X                |       | 8 |
|                              | Right Coronal   |            | X             | X        |          | X        | X                   |                     |                 |                 |           | X             | X               | X         | X         |                  |                | X                |       | 9 |
|                              | Sagittal        | X          |               | X        | X        |          |                     |                     | X               | X               |           |               |                 | X         | X         |                  |                |                  |       | 7 |
|                              | Left Lambdoid   | X          |               |          |          |          |                     |                     |                 |                 |           |               |                 |           |           |                  |                |                  |       | 1 |
|                              | Right Lambdoid  |            |               |          |          |          |                     |                     |                 |                 | X         |               |                 |           |           |                  |                |                  |       | 1 |
|                              | Multi-suture    |            |               |          |          |          |                     | X                   |                 |                 |           |               |                 |           |           | X                |                |                  |       | 2 |
|                              | Syndromic?      |            |               |          |          |          | Y                   |                     | Y               | Y               |           | Y             | Y               |           | Y         |                  |                | Y                |       | 7 |

<sup>a</sup>Y = yes, X = presence of suture fusion

**Supplemental Table 9 Variants described within the homeodomain of homeobox transcription factors at positions corresponding to those in PRRX1.**

| Gene (UniProt ID)      | Position in homeodomain | Genomic Coordinates (GRCh38) | cDNA                  | aa Change                                            | Classification <sup>a</sup>                                                            | Identical aa change to this study? <sup>b</sup> | Functional Data/ Additional Information                                                                                                                                                                |
|------------------------|-------------------------|------------------------------|-----------------------|------------------------------------------------------|----------------------------------------------------------------------------------------|-------------------------------------------------|--------------------------------------------------------------------------------------------------------------------------------------------------------------------------------------------------------|
| <i>CRX</i> (O43186)    | 3                       | chr19: 47836263              | NM_000554.6: c.121C>T | p.(Arg41Trp)                                         | Likely pathogenic (PS3 – Strong, PM1 – Moderate, PP1 - Supporting)                     | No                                              | Decreased DNA binding activity in mutant compared to wild-type (WT) as illustrated by an electrophoretic mobility shift assay (EMSA). <sup>2</sup>                                                     |
|                        |                         | chr19: 47836264              | NM_000554.6:c.122G>A  | p.(Arg41Gln)                                         | Likely pathogenic (PS3 – Strong, PM1 – Moderate, PM5 – Moderate, PP4 – Supporting)     |                                                 |                                                                                                                                                                                                        |
| <i>HESX1</i> (Q9UBX0)  | 3                       | chr3: 57198784               | NM_003865.3:c.326G>A  | p.(Arg109Gln)                                        | Likely pathogenic (PS3 – Strong, PM1 – Moderate, PM6 - Moderate)                       | No                                              | Nuclear localization, as illustrated through immunofluorescence, showed no difference between WT and mutant <i>HESX1</i> . DNA-binding ability was abrogated in the mutant using an EMSA. <sup>3</sup> |
| <i>PHOX2B</i> (Q99453) | 3                       | chr4: 41747479               | NM_003924.4:c.299G>T  | p.(Arg100Leu)                                        | Likely pathogenic (PM1 – Moderate, PM2 – Moderate, PP1 – Supporting, PP3 - Supporting) | No                                              | No functional analysis. Heterozygous variant predicted damaging owing to position in homeodomain. <sup>4</sup>                                                                                         |
| <i>SHOX</i> (O15266)   | 3                       | chrX: 634695                 | NM_000451.4:c.355C>G  | p.(Arg119Gly)                                        | Likely pathogenic (PM1 – Moderate, PM2 – Moderate, PP1 – Supporting, PP4 - Supporting) | No                                              | No functional analysis. Missense variant predicted damaging owing to change in charge. <sup>5</sup>                                                                                                    |
| <i>POU4F1</i> (Q01851) | 22                      | -                            | -                     | Experimental substitution to isoleucine <sup>c</sup> | -                                                                                      | No                                              | This variant is not described in a patient. The authors substituted the 20 <sup>th</sup> position of the                                                                                               |

|                           |    |                    |                           |               |                                                                                                                       |                      |                                                                                                                                                                            |
|---------------------------|----|--------------------|---------------------------|---------------|-----------------------------------------------------------------------------------------------------------------------|----------------------|----------------------------------------------------------------------------------------------------------------------------------------------------------------------------|
|                           |    |                    |                           |               |                                                                                                                       |                      | homeodomain to isoleucine in <i>POU4F1</i> , which resulted in a decrease in promoter activity. <sup>6</sup>                                                               |
| <i>MSX2</i><br>(P35548)   | 31 | chr5:<br>174729294 | NM_002449.5:c.5<br>15G>A  | p.(Arg172His) | Pathogenic (PS1 – Strong,<br>PS3 – Strong, PM1 –<br>Moderate, PP1 –<br>Supporting)                                    | No                   | Mutant bound target sequence with an affinity 15% that of WT. <sup>7</sup>                                                                                                 |
| <i>PROP1</i><br>(O75360)  | 31 | chr5:<br>177994152 | NM_006261.5:c.2<br>96G>A  | p.(Arg99Gln)  | Likely pathogenic (PS3 –<br>Strong, PM1 – Moderate,<br>PP1 – Supporting )                                             | Yes<br>p.(Arg124Gln) | Reduced DNA binding activity in mutant compared to WT as demonstrated via an EMSA. Mutant was unable to activate the reporter in a luciferase assay. <sup>8</sup>          |
| <i>SHOX</i><br>(O15266)   | 31 | chrX:<br>634780    | NM_000451.4:c.4<br>40G>A  | p.(Arg147His) | Likely pathogenic (PM1 –<br>Moderate, PM2 –<br>Moderate, PM5 –<br>Moderate,<br>PM6 – Moderate, PP4 -<br>Supporting)   | No                   | No functional analysis but considered damaging owing to conservation and position in the homeodomain. <sup>9</sup>                                                         |
|                           |    | chrX:<br>634780    | NM_000451.4:c.4<br>40G>C  | p.(Arg147Pro) | Likely pathogenic<br>(PM1 – Moderate, PM2 –<br>Moderate, PM6 –<br>Moderate, PP3 –<br>Supporting, PP4 -<br>Supporting) |                      | No functional analysis; heterozygous variant considered damaging owing to conservation and PolyPhen score. <sup>10</sup>                                                   |
| <i>HOXA13</i><br>(P31271) | 51 | chr7:271982<br>51  | NM_000522.5:c.1<br>114A>C | p.(Asn372His) | Likely pathogenic (PS2 –<br>Strong, PM1 – Moderate,<br>PM2 – Moderate)                                                | No                   | No functional analysis but considered damaging owing to position within the homeodomain and presence of a <i>de novo</i> variant in the affected individual. <sup>11</sup> |

|                          |    |                    |                           |               |                                                                                                  |                      |                                                                                                                                                                                                                                                                                                                                                                                                                                              |
|--------------------------|----|--------------------|---------------------------|---------------|--------------------------------------------------------------------------------------------------|----------------------|----------------------------------------------------------------------------------------------------------------------------------------------------------------------------------------------------------------------------------------------------------------------------------------------------------------------------------------------------------------------------------------------------------------------------------------------|
| <i>LMX1B</i><br>(O60663) | 51 | chr9:129455<br>868 | NM_001174146:c.<br>807C>A | p.(Asn269Lys) | Likely pathogenic (PS2 –<br>Strong, PM1 – Moderate,<br>PM2 – Moderate)                           | Yes<br>p.(Asn144Lys) | No DNA binding activity in<br>mutant yet strong activity in<br>WT. <sup>12</sup>                                                                                                                                                                                                                                                                                                                                                             |
| <i>SHOX</i><br>(O15266)  | 51 | chrX:640833        | NM_000451.4:c.4<br>99A>G  | p.(Asn167Asp) | Likely pathogenic (PM1 –<br>Moderate, PM2 –<br>Moderate, PM6 –<br>Moderate, PP3 –<br>Supporting) | No                   | No functional analysis but<br>considered damaging by Alamut<br>software. <sup>13</sup>                                                                                                                                                                                                                                                                                                                                                       |
| <i>LHX3</i><br>(Q9UBR4)  | 54 | chr9:<br>136198798 | NM_178138.6:c.6<br>29C>T  | p.(Ala210Val) | Likely pathogenic (PS3 –<br>Strong, PM1 – Moderate,<br>PM2 – Moderate, PP4 -<br>Supporting)      | No                   | Homozygous variant.<br>Significantly reduced DNA<br>binding activity in mutant<br>compared to WT as shown by<br>an EMSA. <sup>14</sup>                                                                                                                                                                                                                                                                                                       |
| <i>PROP1</i><br>(O75360) | 54 | chr5:177993<br>017 | NM_006261.5:c.3<br>73C>T  | p.(Ala125Trp) | Likely pathogenic (PM1 –<br>Moderate, PM2 –<br>Moderate, PM3 –<br>Moderate, PP1 –<br>Supporting) | No                   | WT and mutant plasmids were<br>indifferent when nuclear<br>localization was assessed. The<br>mutant retained ability to bind<br>DNA, as shown via an EMSA, but<br>showed faster migration. There<br>was a subtle reduction in<br>luciferase reporter activity in<br>the mutant compared to WT.<br>This patient is compound<br>heterozygous for this missense<br>variant and an indel resulting in<br>a frameshift (c.310delC). <sup>15</sup> |
| <i>SHOX</i><br>(O15266)  | 54 | chrX:<br>640842    | NM_000451.4:c.5<br>08G>C  | p.(Ala170Pro) | Likely pathogenic (PS3 –<br>Strong, PM1 – Moderate,<br>PM2 – Moderate, PP4 –<br>Supporting)      | No                   | Both homozygous and<br>heterozygous variants reported.<br><i>SHOX</i> mutants show abnormal<br>nuclear localization. <sup>16,17</sup>                                                                                                                                                                                                                                                                                                        |
|                          |    | chrX:<br>640843    | NM_000451.4:c.5<br>09C>A  | p.(Ala170Asp) | Likely pathogenic (PM1 –<br>Moderate, PM2 –<br>Moderate, PP1 –                                   |                      |                                                                                                                                                                                                                                                                                                                                                                                                                                              |

|                         |    |                    |                          |               |                                                                                                             |                      |                                                                                                                                                                                       |
|-------------------------|----|--------------------|--------------------------|---------------|-------------------------------------------------------------------------------------------------------------|----------------------|---------------------------------------------------------------------------------------------------------------------------------------------------------------------------------------|
|                         |    |                    |                          |               | Supporting, PP4 – Supporting)                                                                               |                      |                                                                                                                                                                                       |
| <i>RAX</i><br>(Q9Y2V3)  | 57 | chr18:<br>59269470 | NM_013435.3:c.5<br>75G>A | p.(Arg192Gln) | Pathogenic (PS3 – Strong, PM1 – Moderate, PM2 – Moderate, PM3 – Moderate)                                   | No                   | Compound heterozygous for the missense variant and p.(Gln147*). The missense variant showed reduced DNA binding activity compared to the WT, as illustrated by an EMSA. <sup>18</sup> |
| <i>SHOX</i><br>(O15266) | 57 | chrX:<br>640851    | NM_000451.4:c.5<br>17C>T | p.(Arg173Cys) | Pathogenic (PS3 – Strong, PM1 – Moderate, PM2 – Moderate, PM5 – Moderate, PM6 – Moderate, PP4 – Supporting) | Yes<br>p.(Arg150His) | <i>SHOX</i> mutants show abnormal nuclear localization and no DNA binding activity in an EMSA. <sup>19</sup>                                                                          |
|                         |    | chrX:<br>640852    | NM_000451.4:c.5<br>18G>A | p.(Arg173His) | Likely pathogenic (PS3 – Strong, PM1 – Moderate, PM5 – Moderate, PM6 – Moderate, PP4 – Supporting)          |                      | <i>SHOX</i> mutants show abnormal nuclear localization and no DNA binding activity in an EMSA. <sup>19</sup>                                                                          |
|                         |    | chrX:<br>640852    | NM_000451.4:c.5<br>18G>T | p.(Arg173Leu) | Likely pathogenic (PM1 – Moderate, PM2 – Moderate, PM5 – Moderate, PM6 – Moderate, PP4 – Supporting)        |                      | No functional analysis but considered damaging owing to its position within the homeodomain. <sup>13</sup>                                                                            |

<sup>a</sup>Variants are classified based on ACMG criteria: <https://www.acgs.uk.com/media/11631/uk-practice-guidelines-for-variant-classification-v4-01-2020.pdf>

<sup>b</sup>See table 1 for additional information on the variants described in *PRRX1* in this study.

<sup>c</sup>In *PRRX1* residue 22 encodes arginine.

**Supplemental Table 10 Potential explanations for the more severe agnathia-otocephaly phenotypes associated with heterozygous *PRRX1* variants.**

| Explanation                                                                                                                                                            | Comments                                                                                                                                                                                                                                                                                                                                                                                              |
|------------------------------------------------------------------------------------------------------------------------------------------------------------------------|-------------------------------------------------------------------------------------------------------------------------------------------------------------------------------------------------------------------------------------------------------------------------------------------------------------------------------------------------------------------------------------------------------|
| A variant present on the <i>trans</i> - allele was not identified                                                                                                      | All 3 reports state that the entire coding region of <i>PRRX1</i> was sequenced; however, non-coding variants or a partial deletion of the <i>trans</i> allele (separated from the site of the heterozygous substitution) could have been missed                                                                                                                                                      |
| The normal <i>trans</i> - allele harboured sequences (in the 5' or 3' UTR or in intronic or flanking regions in <i>cis</i> ) causing reduced expression of this allele | Significant ( $P = 4 \times 10^{-9}$ ) cis-eQTL rs56250774 with effect size -0.57 identified for <i>PRRX1</i> in anterior cingulate cortex (GTex consortium)                                                                                                                                                                                                                                          |
| An additional loss of function variant was present in the <i>PRRX2</i> gene                                                                                            | 1. In support of this, synergism between <i>Prrx1</i> and <i>Prrx2</i> is particularly evident for the mandible, which is severely reduced in <i>Prrx1</i> <sup>-/-</sup> ; <i>Prrx2</i> <sup>-/-</sup> double knockout mice <sup>20,21</sup><br>2. The constraint score of <i>PRRX2</i> (pLI) = 0.31 (1 LoF observed, 3.8 expected); no common (>10 <sup>-4</sup> ) LoF alleles identified in gnomAD |
| Variation in expression of <i>PRRX2</i> influences the phenotype                                                                                                       | Significant ( $P = 8 \times 10^{-8}$ ) cis-eQTL rs11788582 with effect size -0.21 identified for <i>PRRX2</i> in tibial artery (GTex consortium)                                                                                                                                                                                                                                                      |
| Other factors in the genetic background                                                                                                                                | Variants in <i>OTX2</i> are more frequent than <i>PRRX1</i> as a cause of agnathia-otocephaly <sup>22,23</sup>                                                                                                                                                                                                                                                                                        |



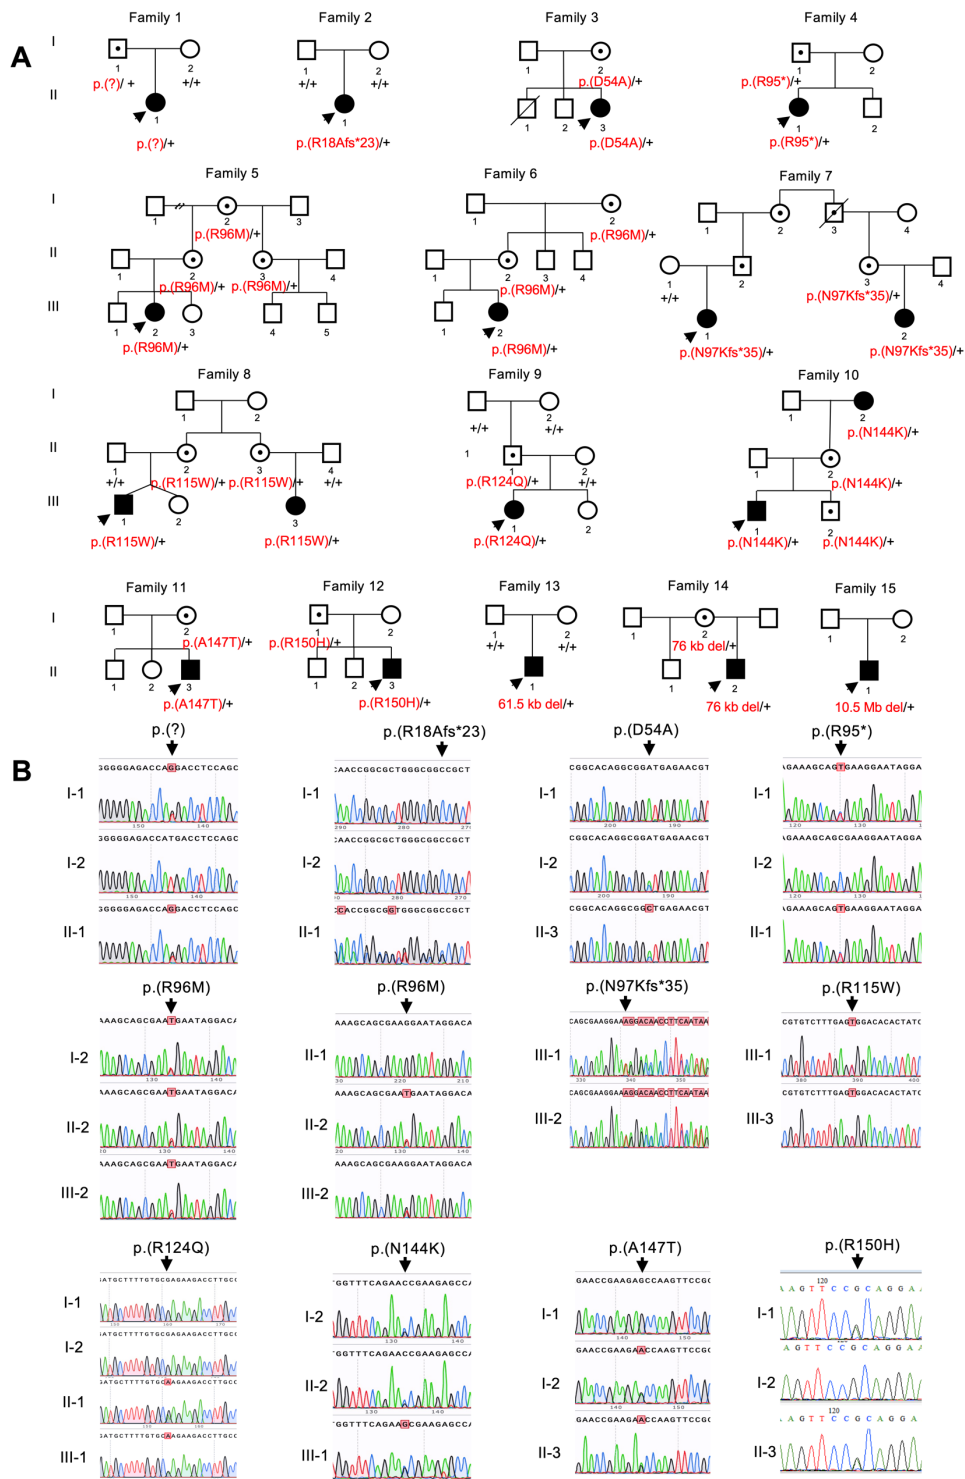

**Supplemental Figure 1 Pedigree figures and dideoxy sequencing confirmation of each variant. (A)** Pedigrees of all families in which a small nucleotide variant or deletion was identified in *PRRX1*. The index patient is denoted by the arrowhead. If available, inheritance of the variant from family members have been confirmed by sequencing and documented on the pedigree (red lettering). A dot in the middle of the pedigree symbol indicates a heterozygote family member. **(B)** Confirmation of small nucleotide variants (by dideoxy-sequencing) identified by whole genome sequencing and targeted resequencing analyses (PCR and hybridization capture). Sanger traces show a representative result from forward or reverse sequencing. Arrows indicate the position of each variant.

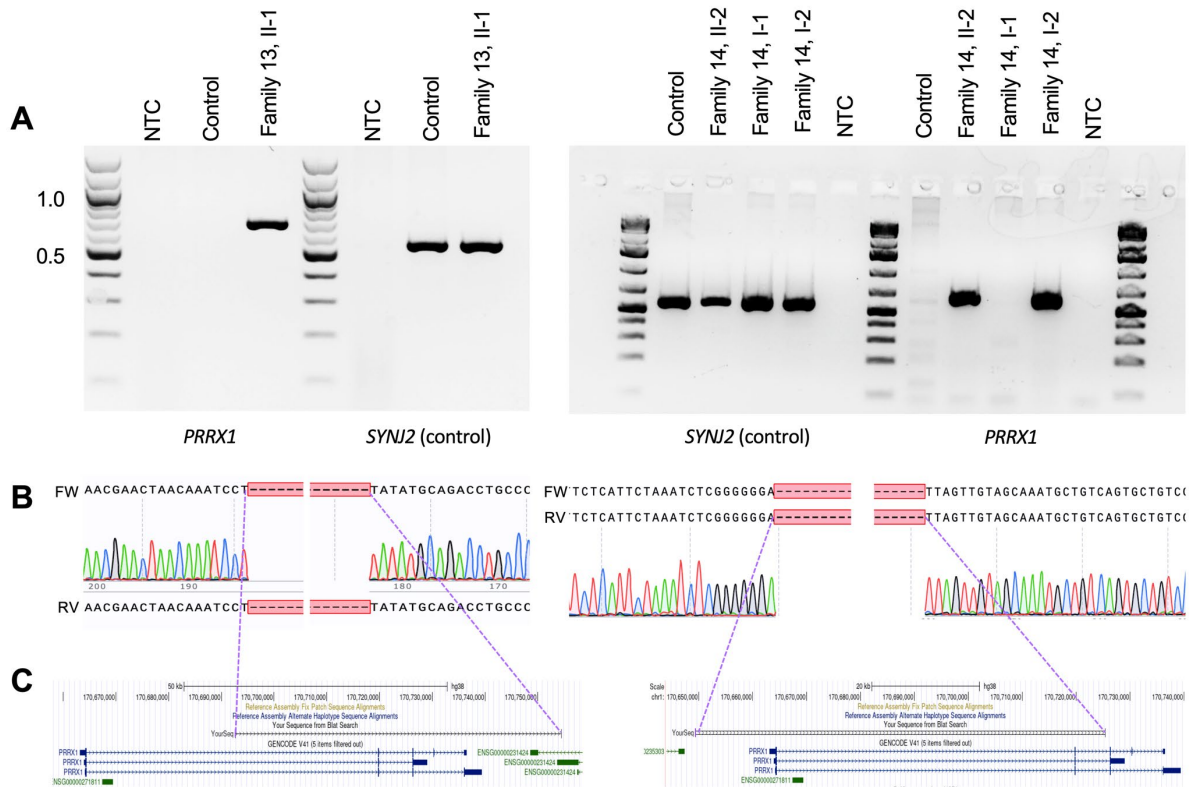

**Supplemental Figure 2 Analysis of the breakpoints of partial deletions including *PRRX1*.** (A, B) Left, breakpoints in Family 13; right, breakpoints in Family 14. (A) Breakpoint PCR of the affected proband, available family members, and a healthy control showing presence of the amplified product using *PRRX1* primers in both families with the deletion, but no product in the healthy control. Primers amplifying a region of *SYNJ2* (552 bp) were used to confirm that the control sample could be amplified. NTC = no template control. (B) Forward (FW) and reverse (RV) dideoxy sequencing traces showing the region of the respective 3' and 5' breakpoints. (C) A screenshot from UCSC genome browser indicating the region of *PRRX1* where the two breakpoints align (GRCh38: left = chr1:170692716\_170754397del, right = chr1:170649419\_170725333del).

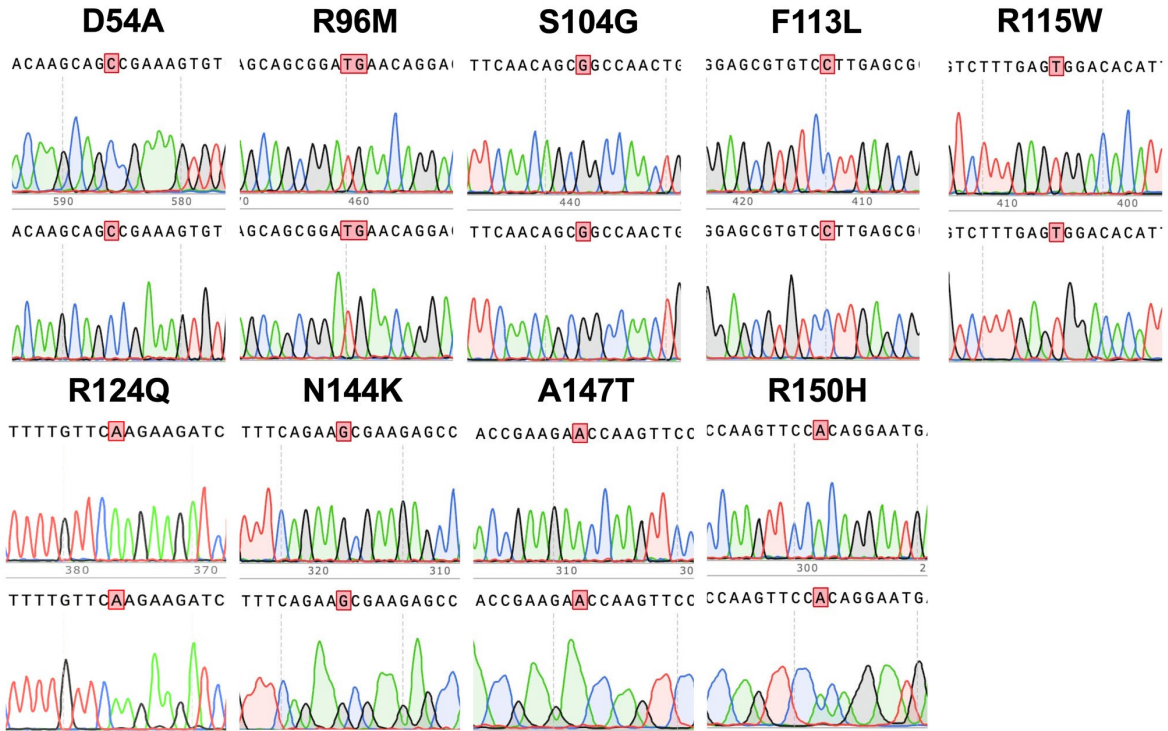

**Supplemental Figure 3 Sanger sequencing traces of plasmids used in immunofluorescence analyses.** Nine missense variants assayed in the immunofluorescence analysis. For each construct the forward and reverse reads are shown (top and bottom, respectively).

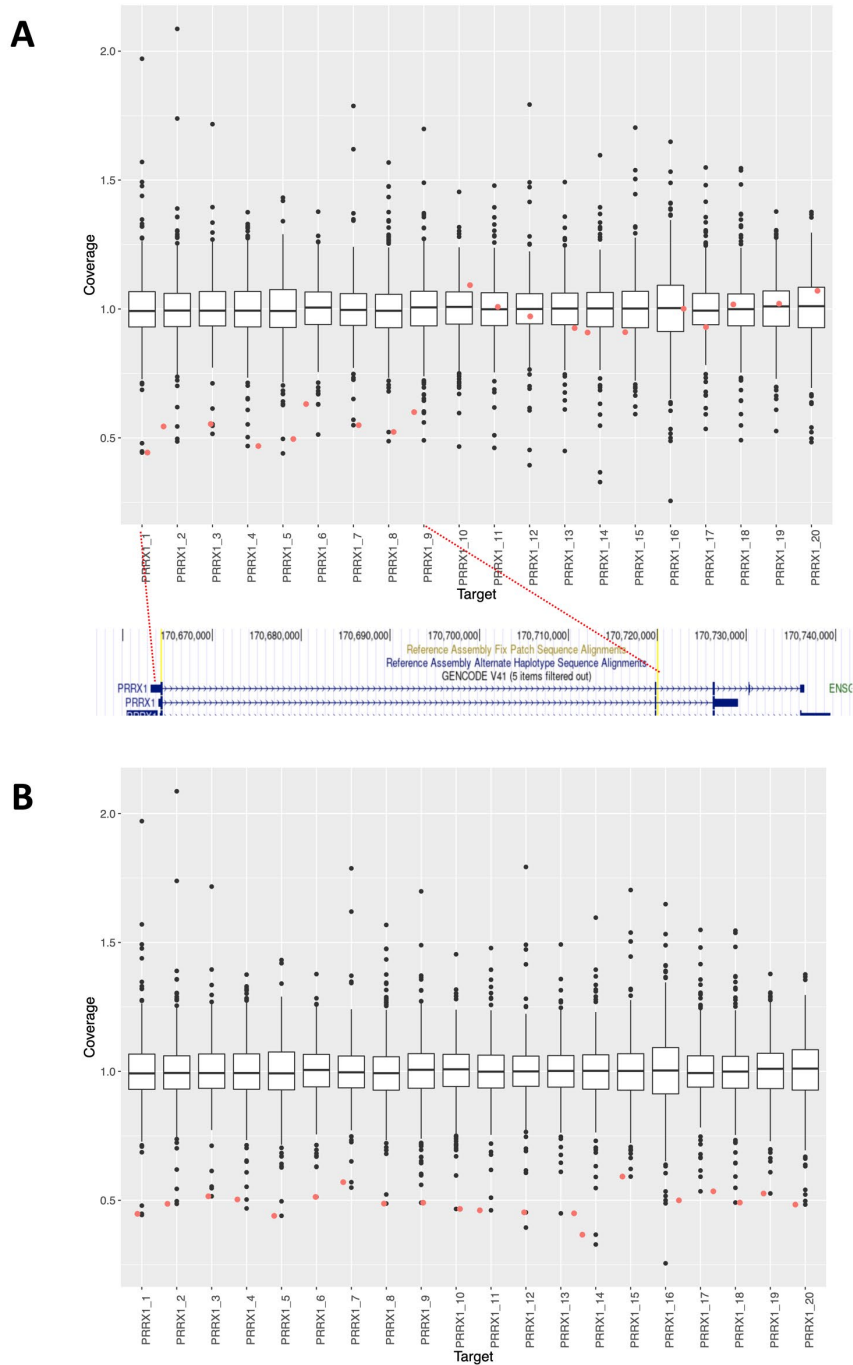

**Supplemental Figure 4 Analysis of coverage of *PRRX1* in a screen of 479 unsolved craniosynostosis patients (A-B)** Images show a boxplot of the normalized probe coverage for 20 non-overlapping regions in *PRRX1*. For each target, the horizontal centre line in the box marks the mean normalized coverage considering 479 samples, the top and bottom line of the box mark the upper (75<sup>th</sup> percentile; Q3) and lower (25<sup>th</sup> percentile; Q1) interquartile ranges (IQR). For each box plot, the vertical line extends to the maximum and minimum values (Q3 + 1.5\*IQR and Q1 - 1.5\*IQR, respectively). Any normalized probe coverage values above or below the maximum and minimum are annotated as a dot (outliers). (A) Partial deletion of *PRRX1* (sample II-2 from Family 14; red dots), resulting in reduced normalized coverage of probes 1–9 (below 0.6), corresponding to the deletion of exons 1–2 as shown by the yellow lines in the below UCSC screenshot (chr1: 170664249–170719963 [GRCh38]). (B) Whole gene deletion of *PRRX1* (sample II-1 from Family 15; red dots) shown by a drop in coverage (below 0.6) across all probes (spanning exons 1–5; chr1: 170664249–170736267 [GRCh38]).

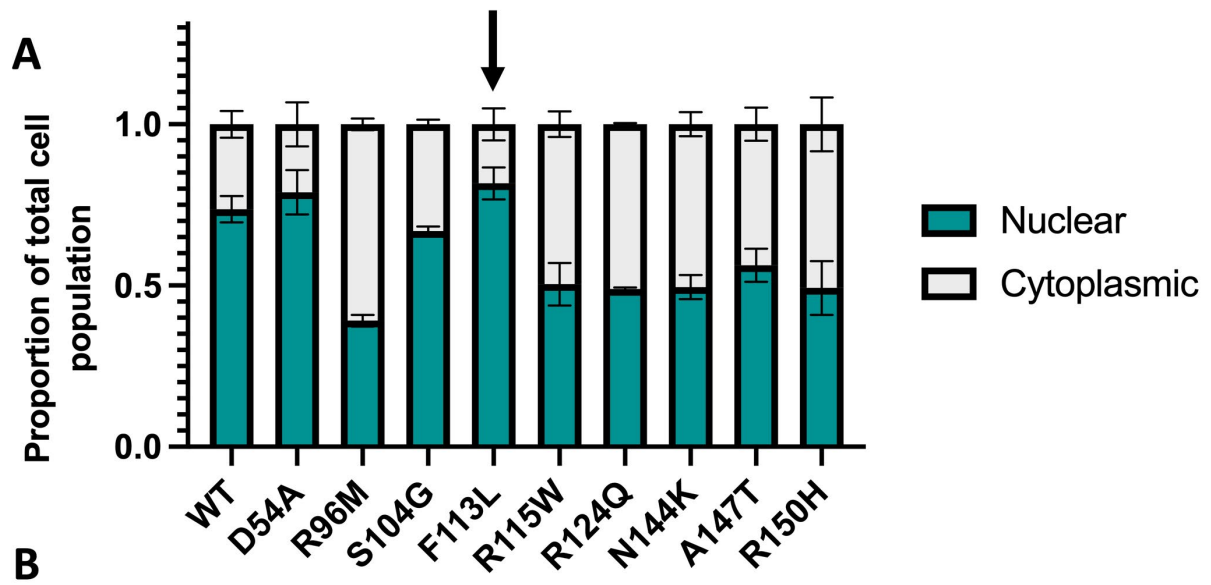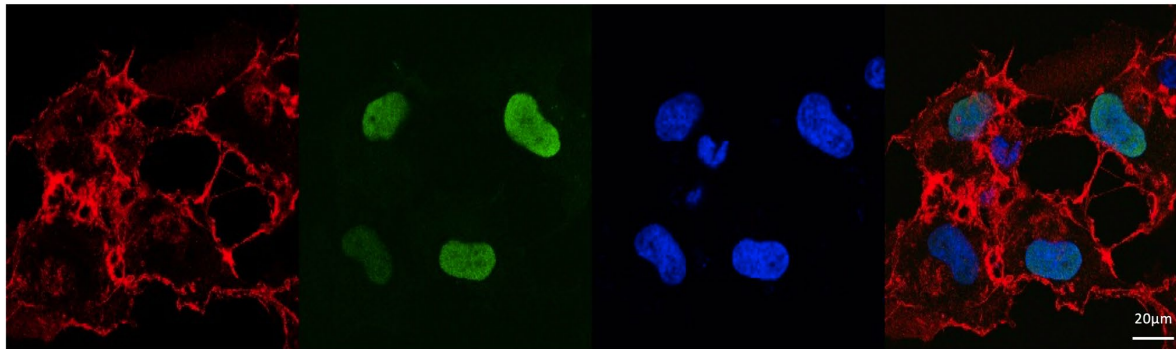

**Supplemental Figure 5 Analysis of the p.(Phe113Leu) variant identified in a patient with agnathia-otocephaly.** (A) Results from the ScanR analysis showed no significant difference between the proportion of nuclear cells in the F113L background compared to the wild-type protein. (B) Confocal microscopy showing four cells expressing the F113L construct with the cytoplasm stained in red (actin), PRRX1 stained in green, and the nucleus stained in blue.

## REFERENCES

1. Koelling N, Bernkopf M, Calpena E, et al. Amplimap: a versatile tool to process and analyze targeted NGS data. *Bioinformatics*. Dec 15 2019;35(24):5349-5350. doi:10.1093/bioinformatics/btz582
2. Swain PK, Chen S, Wang Q-L, et al. Mutations in the Cone-Rod Homeobox Gene Are Associated with the Cone-Rod Dystrophy Photoreceptor Degeneration. *Neuron*. 1997;19:1329-1336.
3. Takagi M, Takahashi M, Ohtsu Y, et al. A novel mutation in HESX1 causes combined pituitary hormone deficiency with optic dysplasia phenotypes. *Endocrine Journal*. 2016;63(4):405-410.
4. Trochet D, Bourdeaut F, Janoueix-Lerosey I, et al. Germline Mutations of the Paired-Like Homeobox 2B (PHOX2B) Gene in Neuroblastoma. *Am J Hum Genet*. 2004;74:761-764.
5. Binder G, Renz A, Martinez A, et al. SHOX haploinsufficiency and Leri-Weill dyschondrosteosis: prevalence and growth failure in relation to mutation, sex, and degree of wrist deformity. *J Clin Endocrinol Metab*. Sep 2004;89(9):4403-8. doi:10.1210/jc.2004-0591
6. Dawson SJ, Palmer RD, Morris PJ, Latchman DS. Functional role of position 22 in the homeodomain of Brn-3 transcription factors. *Molecular Neuroscience*. 1998;9(10):2305-2309.
7. Wilkie A, Tang Z, Elanko N, et al. Functional haploinsufficiency of the human homeobox gene MSX2 causes defects in skull ossification. *Nature Genetics*. 2000;24:387-390.
8. Vieira TC, Dias da Silva MR, Cerutti JM, et al. Familial combined pituitary hormone deficiency due to a novel mutation R99Q in the hot spot region of Prophet of Pit-1 presenting as constitutional growth delay. *J Clin Endocrinol Metab*. Jan 2003;88(1):38-44. doi:10.1210/jc.2001-011872
9. Jorge AA, Souza SC, Nishi MY, et al. SHOX mutations in idiopathic short stature and Leri-Weill dyschondrosteosis: frequency and phenotypic variability. *Clin Endocrinol (Oxf)*. Jan 2007;66(1):130-5. doi:10.1111/j.1365-2265.2006.02698.x
10. Ross JL, Kowal K, Quigley CA, et al. The phenotype of short stature homeobox gene (SHOX) deficiency in childhood: contrasting children with Leri-Weill dyschondrosteosis and Turner syndrome. *J Pediatr*. Oct 2005;147(4):499-507. doi:10.1016/j.jpeds.2005.04.069
11. Goodman FR, Bacchelli C, Brady AF, et al. Novel HOXA13 mutations and the phenotypic spectrum of hand-foot-genital syndrome. *Am J Hum Genet*. Jul 2000;67(1):197-202. doi:10.1086/302961
12. Dreyer SD, Zhou G, Baldini A, et al. Mutations in LMX18 cause abnormal skeletal patterning and renal dysplasia in nail patella syndrome. *Nature Genetics*. 1998;19:47-50.
13. Bunyan DJ, Baker KR, Harvey JF, Thomas NS. Diagnostic screening identifies a wide range of mutations involving the SHOX gene, including a common 47.5 kb deletion 160 kb downstream with a variable phenotypic effect. *Am J Med Genet A*. Jun 2013;161A(6):1329-38. doi:10.1002/ajmg.a.35919
14. Pfaeffle RW, Savage JJ, Hunter CS, et al. Four novel mutations of the LHX3 gene cause combined pituitary hormone deficiencies with or without limited neck rotation. *J Clin Endocrinol Metab*. May 2007;92(5):1909-19. doi:10.1210/jc.2006-2177
15. Kelberman D, Turton JP, Woods KS, et al. Molecular analysis of novel PROP1 mutations associated with combined pituitary hormone deficiency (CPHD). *Clin Endocrinol (Oxf)*. Jan 2009;70(1):96-103. doi:10.1111/j.1365-2265.2008.03326.x
16. Barca-Tierno V, Aza-Carmona M, Barroso E, et al. Identification of a Gypsy SHOX mutation (p.A170P) in Leri-Weill dyschondrosteosis and Langer mesomelic dysplasia. *Eur J Hum Genet*. Dec 2011;19(12):1218-25. doi:10.1038/ejhg.2011.128
17. Sabherwal N, Schneider KU, Blaschke RJ, Marchini A, Rappold G. Impairment of SHOX nuclear localization as a cause for Leri-Weill syndrome. *J Cell Sci*. Jun 15 2004;117(Pt 14):3041-8. doi:10.1242/jcs.01152

18. Voronina VA, Kozhemyakina EA, O'Kernick CM, et al. Mutations in the human RAX homeobox gene in a patient with anophthalmia and sclerocornea. *Hum Mol Genet.* Feb 1 2004;13(3):315-22. doi:10.1093/hmg/ddh025
19. Schneider KU, Marchini A, Sabherwal N, et al. Alteration of DNA binding, dimerization, and nuclear translocation of SHOX homeodomain mutations identified in idiopathic short stature and Leri-Weill dyschondrosteosis. *Hum Mutat.* Jul 2005;26(1):44-52. doi:10.1002/humu.20187
20. ten Berge D, Brouwer A, Korving J, Martin JF, Meijlink F. Prx1 and Prx2 in skeletogenesis: roles in the craniofacial region, inner ear and limbs. *Development.* 1998;125:3831-3842.
21. Lu M-F, Cheng H-T, Lacy AR, et al. Paired-Related Homeobox Genes Cooperate in Handplate and Hindlimb Zeugopod Morphogenesis. *Developmental Biology.* 1999;205:145-157.
22. Chassaing N, Sorrentino S, Davis EE, et al. OTX2 mutations contribute to the otocephaly-dysgnathia complex. *J Med Genet.* Jun 2012;49(6):373-9. doi:10.1136/jmedgenet-2012-100892
23. Patat O, van Ravenswaaij-Arts CM, Tantau J, et al. Otocephaly-Dysgnathia Complex: Description of Four Cases and Confirmation of the Role of OTX2. *Mol Syndromol.* Sep 2013;4(6):302-5. doi:10.1159/000353727
